# Supplementary material for: What do arc magmatism trace-element patterns and Sr–Nd–Pb isotopic data reflect? Insights from the Urumieh–Dokhtar magmatic arc of Iran
Source: Copernicus journal article supplement (doi:10.5194/se-16-663-2025), 2025-07-14
Supplement: Supplementary file 1 [file se-16-663-2025-supplement.zip]

## Sheet: Table S2
Locations	Kahak																						Ardestan
	Fordou											Vadghan											Mishab																	Marbin
ELEM./Sample No.	UE 41	UE 42	UE 43	UE 44	UE 45	UE 46	UE 47	UE 48	UE 49	UE 50		UB 11	UB 12	UB 13	UB 14	UB 15	UB 16	UB 17	UB 18	UB 19	UB 20		SA.1	SA.3	SA.5	SA.6	SA.7	SA.9	SA.11	SA.13	SA.14	SA.17	SA.18	SA.19	SA.21	SA.22	SA.23	BK.17		UD 31	UD 32	UD 33	UD 34	UD 35	UD 36	UD 37	UD 38	UD 39	UD 40
Series	LILE-poor	LILE-rich	LILE-rich	LILE-rich	LILE-poor	ITE-rich	LILE-rich	LILE-rich	LILE-rich	LILE-rich		ITE-rich	LILE-rich	LILE-rich	LILE-rich	LILE-rich	LILE-rich	LILE-rich	LILE-rich	LILE-rich	LILE-rich		LILE-poor	ITE-rich	LILE-poor	ITE-rich	LILE-rich	LILE-poor	ITE-rich	LILE-poor	ITE-rich	ITE-rich	LILE-rich	LILE-rich	ITE-rich	LILE-poor	LILE-poor	LILE-poor		LILE-poor	LILE-poor	LILE-poor	LILE-poor	LILE-poor	LILE-poor	LILE-rich	LILE-poor	LILE-poor	LILE-poor
SiO2	49.2	50.02	50.66	46.71	47.94	50.65	55.96	57.03	50.69	51.17		55.72	55.44	52.06	52.97	52.26	53.1	48.39	55.97	55.45	50.09		54.13	53.47	50.33	57.22	51.6	48.74	49.88	51.68	49.89	55.91	47.33	50.15	50.52	50.17	49.53	48.13		51.86	51.25	50.36	52.57	52.91	49.41	52.31	50.04	49.14	51.21
TiO2	1.03	1.11	0.91	1.32	1.47	1.37	1.03	0.92	0.93	0.75		1.3	2.14	1.14	1.35	0.82	0.83	1.25	0.89	1.04	0.98		0.89	1.64	0.89	1.48	1.3	0.93	1.02	0.93	1.42	0.86	0.8	1.36	0.89	1.32	1.07	1.16		1.19	1.06	0.93	0.95	0.93	0.97	1.21	1	0.95	0.72
Al2O3	17.77	17.5	19.38	16.72	20.01	17.16	18.42	17.05	18.32	19.82		17.32	13.45	18.73	16.37	19.11	17.01	18.1	16.51	18.87	19.15		17.85	14.98	17.81	14.94	17.98	18.34	17.4	16.5	16.5	17.01	13.19	17.45	16.71	16.66	16.4	16.61		17.18	17.69	17.74	20.21	17.24	17.13	17.66	17.99	19.48	19.64
FeOt	10.6	11.03	9.59	13.45	11.44	11.26	9.32	8.87	10.8	8.13		6.88	11.36	9.79	11.95	8.76	8.45	12.05	8.81	9.48	10.37		8.33	11.29	7.47	8.68	9.54	10.2	8.34	8.38	9.47	7.9	9.87	10.57	8.13	8.03	9.24	10.51		10.91	10.08	9.94	8.57	10.09	10.32	9.67	10.13	11.05	8.42
MnO	0.18	0.45	0.23	0.37	0.25	0.09	0.29	0.13	0.18	0.16		0.06	0.69	0.21	0.23	0.24	0.19	0.25	0.16	0.15	0.24		0.161	0.24	0.15	0.187	0.108	0.199	0.136	0.195	0.242	0.108	0.162	0.343	0.139	0.131	0.373	0.368		0.16	0.17	0.16	0.14	0.15	0.17	0.16	0.15	0.16	0.25
MgO	6.41	4.37	4.71	5.65	3.49	5.04	2.57	3.5	4.12	3.78		4.91	2.96	4.5	4.04	4.01	4.14	5.29	4.26	2.06	4.26		4.88	3.63	4.26	2.59	2.77	5.71	7.72	5.09	3.89	3.98	12.11	5.32	7.93	6.9	6.27	4.79		5.05	6.06	7.01	3.38	5.12	7.27	4.98	6.51	5.5	5.91
CaO	11.23	4.95	8.43	9.45	9.93	7.19	4.79	7.22	6.7	8.42		10.15	8.25	9.42	9.53	8.26	8.13	9.12	7.29	8.25	9.35		8.31	7.49	9.35	4.73	6.76	6.98	8.19	6.57	5.8	6.8	9.63	4.98	8.61	10.33	4.41	7.72		8.95	9.45	10.52	8.44	9.97	10.6	8.74	10.72	11.78	10.18
Na2O	3.14	1.13	3.3	2.62	2.95	4.25	5.59	3.46	4.03	4.5		3.75	2.46	2.97	2.59	3.61	2.83	2.96	2.64	2.98	3.07		3.26	2.82	2.89	4.71	3.98	3.86	3.52	3.46	2.98	3.4	2.55	5.01	2.68	3.62	4.87	4.39		2.66	2.72	2.14	3.66	2.34	2.3	2.87	2.48	2.04	1.96
K2O	0.25	6.61	0.6	0.85	1.17	1.76	1.13	1.75	0.91	1.18		0.47	1.84	0.8	0.99	1.09	1.93	1.65	2.15	1.02	1.02		0.83	2.18	0.3	1.65	3.79	1.38	1.04	2.4	5.19	1.95	1.64	1.37	1.33	1.11	1.72	0.81		0.38	1.04	0.82	0.97	0.9	0.55	0.9	0.67	0.42	0.27
P2O5	0.11	0.18	0.09	0.17	0.33	0.78	0.19	0.1	0.16	0.11		0.61	0.31	0.25	0.16	0.14	0.13	0.14	0.19	0.15	0.11		0.301	0.507	0.218	0.683	0.352	0.221	0.307	0.397	0.626	0.303	0.33	0.331	0.256	0.659	0.415	0.634		0.23	0.4	0.23	0.14	0.15	0.21	0.35	0.25	0.11	0.11
LOI	1.25	2.55	2.76	1.45	1.76	1.7	1.89	1.26	2.81	3		0.65	1.42	1.38	0.74	2.48	4.2	2.2	1.45	0.93	1.85		1.78	1.58	6	2.75	2.55	3.24	2.31	4.26	3.67	1.94	1.85	3.5	3.43	0.9	5.21	4.78		1.82	1.85	1.28	2.11	1.84	0.73	2.4	1.7	0.7	2.19
Total	101.17	99.9	100.66	98.76	100.74	101.25	101.18	101.29	99.65	101.02		101.82	100.32	101.25	100.92	100.78	100.94	101.4	100.32	100.38	100.49		100.722	99.827	99.668	99.62	100.73	99.8	99.863	99.862	99.678	100.161	99.462	100.384	100.625	99.83	99.508	99.902		100.39	101.77	101.13	101.14	101.64	99.66	101.25	101.64	101.33	100.86
Mg#	55.3498	44.8175	50.1694	46.2691	38.4757	47.8503	36.1133	44.7172	43.8837	48.7995		59.3985	34.8168	48.5135	40.9344	48.4106	50.1084	47.3665	49.7798	30.8174	45.7146		54.5645	39.7264	53.8966	37.9527	37.3124	53.4356	65.488	55.4591	45.7128	50.8056	71.5519	50.7815	66.6612	63.7873	58.177	48.3009		48.6882	55.2052	59.1116	44.7053	50.9853	59.085	51.3549	56.8479	50.5031	58.9971
	UE 41	UE 42	UE 43	UE 44	UE 45	UE 46	UE 47	UE 48	UE 49	UE 50		UB 11	UB 12	UB 13	UB 14	UB 15	UB 16	UB 17	UB 18	UB 19	UB 20		SA-1	SA.3	SA-5	SA.6	SA.7	SA-9	SA.11	SA.13	SA-14	SA.17	SA.18	SA.19	SA.21	SA.22	SA.23	BK.17		UD 31	UD 32	UD 33	UD 34	UD 35	UD 36	UD 37	UD 38	UD 39	UD 40
Ba	78.9	2386.2	183.3	286.2	904.9	412.1	268.3	308.8	319.5	445.5		275	346.2	241.1	247.2	296.4	432.2	783	546.5	182.5	298.4		461.083	695.8	189.896	531.4	1210.1	1076.4	279.5	875.9	1783.53	435	432.5	660.4	284.2	452.6	756.5	185.371		215.5	353.6	142.2	259.5	218.3	190.1	263	291.5	124.4	128
Rb	5.08	424.09	17.67	26.99	34.24	60.2	29.48	56.18	17.24	19.72		11.09	66.7	12.65	32.57	24.93	48.09	36.13	60.25	36.49	31.75		15.9591	69.62	6.30913	28.66	163.07	31.9222	17.79	46.31	142.289	45.65	29.82	48.05	29.74	20.54	46.42	16.6837		5.84	22.75	19.56	22.35	10.32	19.82	25.51	16.53	8.99	6.86
Sr	312.58	398.07	671.98	278.55	598.61	612.93	331.54	308.65	510.56	1666.43		612.86	211.91	456.17	252.24	377.9	251.65	383.74	233.69	290.71	294.01		547.419	331.99	438.857	315.12	470.19	820.159	439.2	408.88	431.12	430.61	534.1	461.79	382.21	896.66	269.64	393.593		490.46	518.99	371.7	414.04	380.88	326.25	592.82	354.2	372.75	297.69
Pb	0	232	62	10	122	5	5	7	4	15		7	9	9	20	20	5	18	10	16	6		4.97385	12	4.03492	7	35	9.0527	3	250	9.9961	10	7	13	3	6	23	209.455		7	6	2	30	3	5	8	8	2	6
Th	1.06	1.62	0.58	0.71	3.78	1.14	1.48	4.66	0.98	5.53		4.26	4.13	2.27	2.2	0.84	3.66	0.65	3.9	1.63	0.52		1.29106	8.08	1.95608	5.06	5.56	1.3126	1.6	2.83	2.45146	4.55	5.08	3.04	1.84	6.22	2.37	2.40117		2.79	1.6	0.95	2.33	0.89	2.21	0.33	1.33	0.85	0.44
Nb	2.52	3.74	1.67	3.11	10.74	19.04	4.1	5.21	4.64	3.31		19.36	6.96	5.44	4.38	2.04	4.82	2.58	6.36	3.32	1.69		8.80765	12.91	5.26053	14.38	8.71	3.84875	17.95	15.95	22.0024	11.86	6.4	7.53	11.28	15.62	16.23	11.4456		6.38	11.31	5.08	8.98	4.33	4.48	2.74	5.04	2.46	2.25
Ta	0.18	0.27	0.15	0.2	0.71	0.94	0.23	0.4	0.28	0.26		1.15	0.47	0.41	0.35	0.16	0.35	0.18	0.42	0.28	0.26		0.496289	1.29	0.319424	1.15	0.69	0.211436	1.47	1.15	1.18131	0.84	0.57	0.72	1.03	1.06	1.03	0.640838		0.44	0.65	0.29	0.56	0.27	0.28	0.14	0.3	0.23	0.2
Zr	44.1	73.1	40.3	34.4	108	77.2	80	88.2	63	74.6		60.7	153.9	69.5	83.3	51.1	92.4	55.6	118.5	62.8	38.5		109.083	215.2	106.388	201.7	152.5	64.398	113.7	149.4	179.477	138.2	131.9	124.2	104	184.7	149.5	93.9894		80.1	99.1	45.7	149.5	61.2	71.5	36.6	63.6	39.5	38
Hf	1.54	2.55	1.36	1.2	3.46	1.97	2.61	3.06	2.2	2.35		2.3	5.04	2.21	2.83	1.65	3.02	1.93	3.7	2.1	1.29		2.64654	5.63	2.68635	4.93	3.94	1.69085	2.51	3.4	4.07127	3.19	3.17	3.19	2.48	3.97	3.43	2.26049		2.6	2.75	1.62	4.34	1.83	2.23	1.47	2.14	1.37	1.31
La	5.39	10.1	3.69	5.47	19.57	16.58	9.32	11.17	10.87	16.26		35.92	17.5	13.87	10.15	4.8	15.32	5.6	12.33	8.48	3.53		15.5773	31.58	12.1454	29.82	21.05	11.1545	14.54	24.49	31.3432	22	24.94	15.72	12.97	47.06	24.21	21.4236		14.56	21.43	12.33	19.26	10.39	10.97	5.48	12.67	5.44	4.96
Ce	12.66	23.11	9.37	12.88	40.19	37.54	21.74	24.83	23.29	30.72		71.2	39.36	30.12	22.7	11.5	29.96	13.96	27.51	18.88	8.78		32.197	66.8	26.0919	63.64	47.02	23.6805	29.02	48.49	64.0838	43.77	56.61	38.32	26.87	99.95	50.52	43.4707		30.85	45.25	26.93	41.73	22.82	23.76	13.83	27	12.43	11.16
Nd	8.83	14.94	6.91	9.58	21.71	22.17	13.76	14.38	13.25	14.42		32.94	24.36	16.42	14.09	8.02	16.5	10.44	15.71	11.92	6.52		16.7538	35.03	14.6371	33.21	24.89	13.3163	14.57	22.8	30.9455	20.73	29.04	21.8	14.04	47.12	24.09	21.4319		17.2	22.85	15.44	22.92	13.27	13.03	9.9	14.45	8.05	7.15
Sm	2.59	4.05	2.12	3.05	5.15	5.67	3.72	3.67	3.12	3.03		6.83	6.61	3.73	3.92	2.29	4.21	3.04	4.27	3.37	1.95		3.67799	8.21	3.50762	7.58	5.78	3.2611	3.32	4.75	6.32835	4.27	6.44	5.42	3.29	8.25	5.23	4.55409		4.12	4.66	3.63	5.67	3.17	3.18	2.71	3.4	2.24	2.03
Eu	1	1.4	0.88	1.1	1.47	1.83	1.25	1.04	1.19	0.99		1.7	1.78	1.25	1.21	0.86	1.63	1.09	1.16	1.23	0.83		1.20272	1.95	1.06432	2.09	1.54	1.0933	1.13	1.38	1.90305	1.28	1.72	1.53	1.09	2.39	1.35	1.30768		1.32	1.5	1.23	1.44	1.11	1.05	1.06	1.14	0.83	0.79
Tb	0.778	0.454	0.706	0.935	0.943	0.722	0.66	0.592	0.444	0		1.355	0.616	0.781	0.528	0.793	0.662	0.808	0.718	0.477	0.517		0.602881	1.302	0.654265	1.213	0.929	0.54935	0.55	0.692	0.946466	0.629	0.784	0.88	0.557	0.813	0.753	0.662546		0.752	0.615	1.012	0.55	0.583	0.562	0.573	0.437	0.403	0.579
Y	21.94	28.75	17.12	27.1	35.87	32.39	26.89	25.57	21.58	16.74		30.51	43.76	21.98	29.81	21.24	29.08	25.84	32.09	28.08	18.84		19.5675	44.09	22.7226	41.52	33.67	18.068	18.66	23.15	29.7977	22.93	22.79	29.68	19.02	23.96	24.92	20.2675		26.44	26.16	21.27	36.19	20.77	21.8	21.57	20.78	16.99	16.34
Ho	0.82	1.01	0.64	1.01	1.31	1.13	0.98	0.89	0.78	0.57		1.13	1.8	0.79	1.1	0.73	0.96	0.98	1.13	1	0.66		0.772625	1.67	0.885949	1.53	1.25	0.719023	0.7	0.88	1.15102	0.84	0.81	1.12	0.72	0.9	0.92	0.789863		1.01	0.95	0.76	1.3	0.74	0.8	0.75	0.76	0.59	0.59
Yb	2.27	2.76	1.68	2.76	3.79	2.74	2.6	2.55	2.16	1.72		2.41	4.89	2.13	3.21	2.14	2.66	2.71	3.31	2.88	1.94		2.09469	4.51	2.47115	4.09	3.32	1.89289	1.87	2.31	3.03724	2.16	1.64	2.95	1.91	2.01	2.51	1.98552		2.73	2.54	1.91	3.47	1.95	2.14	1.99	2	1.66	1.74
Lu	0.343	0.417	0.267	0.432	0.57	0.366	0.393	0.4	0.32	0.258		0.331	0.746	0.317	0.487	0.328	0.415	0.417	0.514	0.447	0.307		0.315845	0.676	0.363522	0.617	0.511	0.282179	0.29	0.344	0.456768	0.357	0.251	0.441	0.287	0.307	0.368	0.295322		0.42	0.371	0.273	0.538	0.308	0.337	0.3	0.31	0.251	0.272
U	0.38	0.84	0.24	0.24	1.27	0.38	0.58	5.73	0.37	2.17		0.87	1.47	0.66	0.83	0.3	1.18	0.25	1.34	5.69	0.21		0.38	2.02	0.62	1.31	1.49	0.39	0.44	0.76	0.73	1.18	1.17	0.78	0.52	1.43	0.68			0.96	0.55	0.29	0.78	0.39	0.79	0.23	0.43	0.31	0.21
	Note: LILE = large-ion lithophile elements; ITE = incompatible trace elements; LOI = Loss On Ignition; Mg# = Mg/(Mg + Fe) mol%
