# Supplementary material for: What do arc magmatism trace-element patterns and Sr–Nd–Pb isotopic data reflect? Insights from the Urumieh–Dokhtar magmatic arc of Iran
Source: Copernicus journal article supplement (doi:10.5194/se-16-663-2025), 2025-07-14
Supplement: Supplementary file 1 [file se-16-663-2025-supplement.zip]

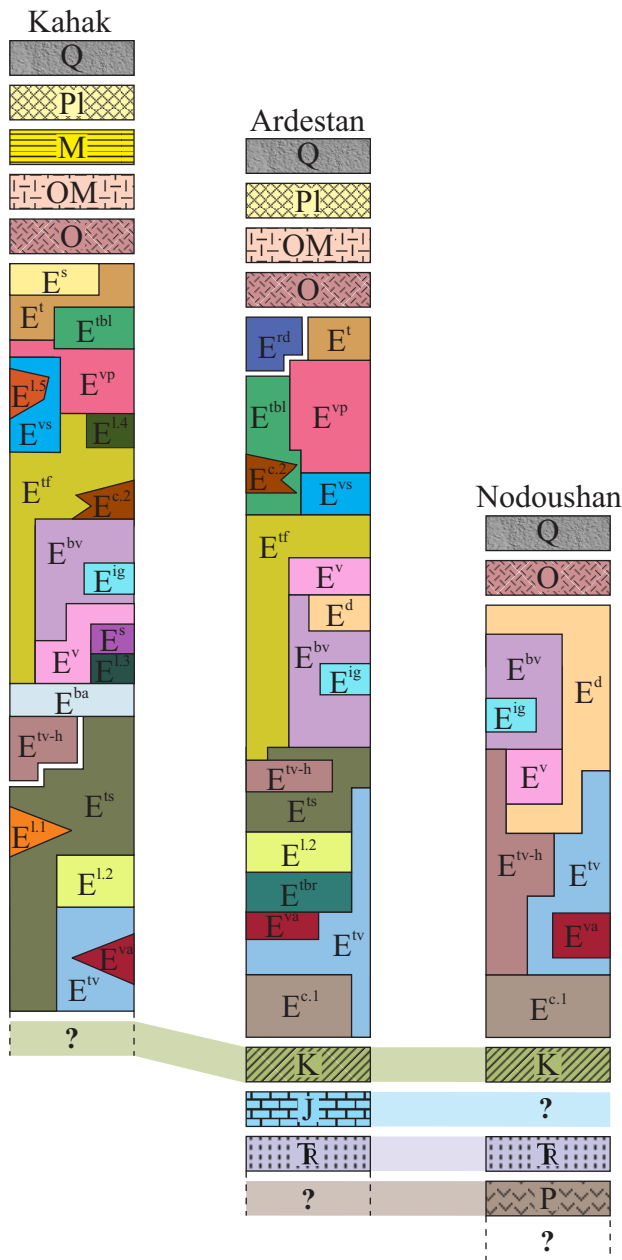

## Legend

|                   |                                                                          |
|-------------------|--------------------------------------------------------------------------|
| Q                 | Q: Quaternary deposits.                                                  |
| Pl                | Pl: Pliocene volcanic and sedimentary rocks.                             |
| M                 | M: Miocene volcanic and sedimentary rocks.                               |
| OM                | OM: Oligo-Miocene sedimentary rocks.                                     |
| O                 | O: Oligocene volcanic and sedimentary rocks.                             |
| E <sup>s</sup>    | E <sup>s</sup> : Sandstone, tuff, conglomerate, and limestone.           |
| E <sup>t</sup>    | E <sup>t</sup> : Tuff, sandstone, and diabase.                           |
| E <sup>rd</sup>   | E <sup>rd</sup> : Rhyolite-dacite and locally rhyolitic tuff.            |
| E <sup>l.5</sup>  | E <sup>l.5</sup> : Nummulitic limestone.                                 |
| E <sup>vp</sup>   | E <sup>vp</sup> : Andesitic-basaltic lava, and volcanic breccia.         |
| E <sup>d</sup>    | E <sup>d</sup> : Dacitic-rhyolitic lava flows.                           |
| E <sup>c.2</sup>  | E <sup>c.2</sup> : Dark green conglomerate.                              |
| E <sup>l.4</sup>  | E <sup>l.4</sup> : Grey and red nummulitic limestone.                    |
| E <sup>tbl</sup>  | E <sup>tbl</sup> : Tuff breccia, intercalated with nummulitic limestone. |
| E <sup>vs</sup>   | E <sup>vs</sup> : Andesitic basalt, andesite, and dacitic andesite.      |
| E <sup>ig</sup>   | E <sup>ig</sup> : Dark grey to red dacitic ignimbrite.                   |
| E <sup>v</sup>    | E <sup>v</sup> : Red-brown andesite-basaltic lava flows.                 |
| E <sup>s</sup>    | E <sup>s</sup> : Alternation of red tuff, sandy tuff, and conglomerate.  |
| E <sup>l.3</sup>  | E <sup>l.3</sup> : Red nummulitic sandy limestone.                       |
| E <sup>bv</sup>   | E <sup>bv</sup> : Tuff breccia, andesitic-basaltic lava, and ignimbrite. |
| E <sup>tf</sup>   | E <sup>tf</sup> : Tuff, tuffaceous sandstone and shale.                  |
| E <sup>ba</sup>   | E <sup>ba</sup> : Grey basaltic-andesitic lava flows and lava breccia.   |
| E <sup>tv-h</sup> | E <sup>tv-h</sup> : Andesitic lava, hyaloclastite, and tuff.             |
| E <sup>ts</sup>   | E <sup>ts</sup> : Green tuff, tuffite, shale, and sandstone.             |
| E <sup>tbr</sup>  | E <sup>tbr</sup> : Light green massive tuff breccia.                     |
| E <sup>l.2</sup>  | E <sup>l.2</sup> : Nummulitic limestone and tuffaceous siltstone.        |
| E <sup>va</sup>   | E <sup>va</sup> : Dark red dacitic-andesitic lava flows.                 |
| E <sup>tv</sup>   | E <sup>tv</sup> : Dark brown dacitic ignimbrite, tuff, and breccia.      |
| E <sup>l.1</sup>  | E <sup>l.1</sup> : Nummulitic sandy limestone.                           |
| E <sup>c.1</sup>  | E <sup>c.1</sup> : Alternation of conglomerate and sandstone.            |
| K                 | K: Cretaceous sedimentary rocks.                                         |
| J                 | J: Jurassic sedimentary rocks.                                           |
| R                 | R: Triassic sedimentary rocks.                                           |
| P                 | P: Paleozoic sedimentary rocks.                                          |
