# Supplementary material for: What do arc magmatism trace-element patterns and Sr–Nd–Pb isotopic data reflect? Insights from the Urumieh–Dokhtar magmatic arc of Iran
Source: Copernicus journal article supplement (doi:10.5194/se-16-663-2025), 2025-07-14
Supplement: Supplementary file 3 [file se-16-663-2025-supplement.zip]

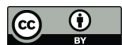

## *Supplement of*

# **What do arc magmatism trace-element patterns and Sr–Nd–Pb isotopic data reflect? Insights from the Urumieh–Dokhtar magmatic arc of Iran**

**Mohammad Reza Ghorbani et al.**

*Correspondence to:* Mohammad Reza Ghorbani (ghorbani@modares.ac.ir)

- se-16-663-2025-supplement-title-page.pdf
- Figure\_S1.pdf
- Figure\_S2.pdf
- Figure\_S3.pdf
- Figure\_S4.pdf
- Figure\_S5.pdf
- Figure\_S6.pdf
- Supplementary Material-captions.docx
- Supplementary Table S1.xlsx
- Supplementary Table S2.xlsx
- Supplementary Table S3.xlsx
- Supplementary Table S4.xlsx
- Supplementary Table S5.xlsx

The copyright of individual parts of the supplement might differ from the article licence.
