# Supplementary material for: What do arc magmatism trace-element patterns and Sr–Nd–Pb isotopic data reflect? Insights from the Urumieh–Dokhtar magmatic arc of Iran
Source: Copernicus journal article supplement (doi:10.5194/se-16-663-2025), 2025-07-14
Supplement: Supplementary file 3 [file Supplementary Table S1.xlsx]

## Sheet: Table S1-UDMA Thin Sections
Sample No.	Series	Texture	Groundmass	Phenocrysts (vol. %)
UB.11	ITE-rich	Porphyritic	Cryptocrystalline	Pl + Cpx + Opx (<10)
			Glass + Fld + Cpx + Opq
UB.12	LILE-rich	Porphyritic	Cryptocrystalline	Pl + Cpx + Ol (<15)
			Glass + Fld + Cpx + Opq
UB.13	LILE-rich	Porphyritic	Microcrystalline	Pl + Cpx (<5)
			Fld + Cpx + Opq
UB.14	LILE-rich	Porphyritic	Cryptocrystalline	Pl (<5)
			Glass + Fld + Opq
UB.15	LILE-rich	Porphyritic	Cryptocrystalline	Pl + Cpx (<15)
			Glass + Fld + Cpx + Opq
UB.16	LILE-rich	Porphyritic	Cryptocrystalline	Pl + Cpx + Opx + Opq (<15)
			Glass + Fld + Cpx + Opq
UB.17	LILE-rich	Porphyritic	Microcrystalline	Pl (glomerocrysts) (<25)
		Glomeroporphyritic	Fld + Cpx + Opq
UB.18	LILE-rich	Porphyritic	Cryptocrystalline	Fld + Cpx + Opx + Ol (pseudomorph) (<15)
			Glass + Fld + Cpx + Opq
UB.19	LILE-rich	Porphyritic	Cryptocrystalline	Fld + Opx + Opq (<15)
			Glass + Fld + Opq ± Cpx
UB.20	LILE-rich	Porphyritic	Cryptocrystalline	Fld + Ol (<15)
			Glass + Fld + Cpx + Opq
UC.21	LILE-poor	Porphyritic	Cryptocrystalline	Fld + Cpx (<20)
			Glass + Fld + Cpx + Opq
UC.22	LILE-poor	Porphyritic (slightly)	Cryptocrystalline	Fld + Opx (<5)
			Glass + Fld + Opq
UC.23	LILE-poor	Porphyritic	Microcrystalline	Fld + Ol + Opx (<10)
			Glass + Fld + Cpx + Opq
UC.24	LILE-poor	Porphyritic	Cryptocrystalline	Fld + Cpx + Ol (<10)
			Glass + Fld + Cpx + Opq
UC.25	LILE-poor	Porphyritic	Vitric	Fld + Cpx (<5)
			Glass + Fld + Opq
UC.26	LILE-poor	Porphyritic (slightly)	Microcrystalline	Fld + Cpx (epidotized) ± Opx ± Ol (<5)
			Glass + Fld + Cpx + Opq
UC.27	LILE-poor	Porphyritic	Cryptocrystalline	Fld + Ol + Opq (<5)
			Glass + Fld + Cpx + Opq
UC.28	LILE-poor	Porphyritic	Cryptocrystalline	Pl + Opx + Ol (<5)
			Glass + Fld + Cpx +Opq
UC.29	LILE-poor	Porphyritic	Cryptocrystalline	Fld + Cpx + Opx (& glomerocrysts) (<15)
			Glass + Fld + Cpx + Opq
UC.30	LILE-poor	Vitrophyric	Fld + Cpx + Opq	Ol (<5)
UD.31	LILE-poor	Porphyritic	Cryptocrystalline	Pl + Ol (<20)
			Glass + Fld + Cpx + Opq
UD.32	LILE-poor	Vitrophyric	Cryptocrystalline	Ol (<5)
			Glass + Fld + Cpx + Opq
UD.33	LILE-poor	Porphyry	Microcrystalline	Pl + Ol (<5)
			Glass + Fld + Cpx + Opq
UD.34	LILE-poor	Porphyry	Microcrystalline	Pl + Cpx (<10)
			Glass + Fld + Cpx + Opq
UD.35	LILE-poor	Porphyritic	Microcrystalline	Pl + Ol + Cpx + Opq (<10)
			Glass + Fld + Cpx + Opq
UD.36	LILE-poor	Porphyritic	Microcrystalline	Pl + Opq (<5)
			Glass + Fld + Cpx + Opq
UD.37	LILE-poor	Porphyritic	Vitric	Pl + Cpx + Opq (<10)
			Glass
UD.38	LILE-poor	Porphyritic	Microcrystalline	Ol (<5)
			Glass + Fld + Cpx + Opq
UD.39	LILE-poor	Porphyritic	Cryptocrystalline	Pl + Cpx + Ol (<10)
			Glass + Pl + Cpx + Opq
UE.41	LILE-rich	Vitrophyric	Cryptocrystalline	(no phenocrysts)
			Glass + Fld + Cpx + Opq
UE.42	LILE-rich	Porphyritic	Cryptocrystalline	Fld + Opx (<5)
			Glass + Fld + Cpx + Opq
UE.43	LILE-rich	Porphyry	Microcrystalline	(no sharp boundry between phenocrysts and groundmass minerals)
		Microgranular	Glass + Fld + Cpx + Opq
UE.44	LILE-rich	Porphyry	Microcrystalline	Fld + Cpx + Opx + Opq (<20)
			Glass + Fld + Cpx + Opq
UE.45	LILE-rich	Porphyry	Microcrystalline	Fld + Cpx + Ol + Opq (<15)
		Ophitic	Glass + Fld + Cpx + Opq
UE.46	ITE-rich	Porphyritic (slightly)	Cryptocrystalline	Fld (<5)
			Glass + Fld + Cpx + Opq
UE.47	LILE-rich	Porphyritic	Cryptocrystalline	Fld + Opq (<10)
			Glass + Fld + Cpx + Opq
UE.48	LILE-rich	Porphyritic	Cryptocrystalline	Pl + Cpx + Ol + Opq (<15)
			Glass + Fld + Cpx + Opq
UE.49	LILE-rich	Microgranular	Microcrystalline	(no phenocrysts)
			Fld + Cpx + Opq
UE.50	LILE-rich	Porphyritic	Vitric	Pl + Cpx + Opq (<15)
			Glass
SA.3	ITE-rich	Porphyritic	Glass + Fld + Cpx + Opq	Pl + Cpx + Opq (<15)
SA.6	ITE-rich	Microcrystalline	Fld + Opq	(no phenocrysts)
SA.11	ITE-rich	Porphyritic	Fld + Cpx + Opq	Pl + Ol + Opq (<10)
SA.14	ITE-rich	Vitrophyric	Glass + Fld + Opq	Pl (<5)
SA.17	ITE-rich	Vitrophyric	Glass + Fld + Opq	Pl (<5)
SA.21	ITE-rich	Porphyritic	Microgranular	Ol (<5)
			Glass + Fld + Cpx + Opq
SA.7	LILE-rich	Porphyritic	Glass + Fld+ Opq	Pl + Ol (<15)
SA.18	LILE-rich	Porphyritic	Glass + Fld + Cpx + Ol	Ol + Cpx (<10)
SA.19	LILE-rich	Porphyritic	Glass + Fld+ Cpx + Opq	Pl + Opx + Opq (<35)
AN.13	LILE-rich	Porphyritic	Vitric	Fld + Amp + Opx + Cpx + Opq (<10)
			Glass
AN.14	LILE-rich	Vitrophyric	Glass + Fld	Fld (<5)
AN.18	LILE-rich	Vitrophyric	Glass	Pl + Cpx + Opx + Opq (<5)
AN.19	LILE-rich	Vitrophyric	Cryptocrystalline	Fld (<5)
			Glass + Fld + Opq
AN.27	LILE-rich	Microgranular	-	Fld + Cpx + Amp + Opq (<5)
AN.33	LILE-rich	Porphyritic	Glass	Pl + Cpx + Opx + Opq (<5)
AN.34	LILE-rich	Porphyritic	Cryptocrystalline	Pl + Cpx + Opx + Opq (<10)
			Glass + Fld + Opq
SA.1	LILE-poor	Porphyritic	Glass + Fld	Pl + Opx (<5)
SA.9	LILE-poor	Porphyritic (slightly)	Cryptocrystalline	Pl + Cpx + Opx (<5)
			Glass + Fld + Cpx + Opq
SA.13	LILE-poor	Microgranular	Glass + Fld + Opq	(no phenocrysts)
SA.23	LILE-poor	Microgranular	Glass + Fld + Opq	Ol + Opx (<5)

## Sheet: List of abbreviations
Fld	Feldspar
Pl	Plagioclase
Ol	Olivine
Cpx	Clinopyroxene
Opx	Orthopyroxene
Amp	Amphibole
Opq	Opaque minerals
