# Supplementary material for: What do arc magmatism trace-element patterns and Sr–Nd–Pb isotopic data reflect? Insights from the Urumieh–Dokhtar magmatic arc of Iran
Source: Copernicus journal article supplement (doi:10.5194/se-16-663-2025), 2025-07-14
Supplement: Supplementary file 5 [file Supplementary Table S3.xlsx]

## Sheet: Table S3
	Vadghan				Kahang		Marbin			Fordou				Mishab					Tafresh
Sample No.	UB 11	UB 15	UB 20		UC 28		UD 37	UD 39		UE 41	UE 44	UE 46		SA.1	SA.9	SA.11	SA.14		UA 2
Series	ITE-rich	LILE-rich	LILE-rich		LILE-poor		LILE-rich	LILE-poor		LILE-poor	LILE-rich	ITE-rich		LILE-poor	LILE-poor	ITE-rich	ITE-rich		LILE-poor
87Rb/86Sr	0.0506298	0.184589	0.302161		0.095968		0.120411	0.0674825		0.0454766	0.27112	0.274815		0.0815711	0.10891	0.113324	0.923469		0.016491
87Sr/86Sr measured	0.705125	0.705719	0.70562		0.705099		0.706085	0.705427		0.706263	0.70574	0.705561		0.70536	0.705977	0.704443	0.705418		0.705182
2 sigma (.10-6)	4	5	5		5		5	5		5	5	5		5	5	5	5		6
87Sr/86Sr initial	0.705096	0.705614	0.705448		0.705044		0.706017	0.705389		0.706237	0.705586	0.705405		0.705314	0.705915	0.704379	0.704893		0.705173
147Sm/144Nd	0.110047	0.151546	0.158734		0.120186		0.145284	0.147684		0.155676	0.168973	0.135738		0.116514	0.129975	0.120938	0.108536		0.142409
143Nd/144Nd measured	0.5127	0.512786	0.512784		0.51272		0.512715	0.512715		0.51267	0.512736	0.512673		0.512681	0.512607	0.512804	0.512684		0.512766
2sigma (.10-6)	7	9	4		7		6	6		3	4	6		5	7	6	4		5
143Nd/144Nd initial	0.512671	0.512746	0.512742		0.512689		0.512677	0.512676		0.512629	0.512692	0.512637		0.512651	0.512573	0.512772	0.512656		0.512729
ԐNd initial	1.65184	3.11779	3.04209		1.99027		1.76462	1.75237		0.833679	2.0534	0.993976		1.24817	-0.2642	3.62518	1.34741		2.77425
206Pb/204Pb	18.613	18.5797	18.6813		18.723		18.593	18.687		18.554	18.597	18.721		18.564	18.52	18.622	18.624		18.682
207Pb/204Pb	15.581	15.6004	15.6526		15.6894		15.615	15.684		15.543	15.528	15.691		15.602	15.562	15.642	15.514		15.631
208Pb/204Pb	38.5	38.5954	38.6144		38.7178		38.542	38.742		38.358	38.336	38.8		38.555	38.528	38.571	38.664		38.7069
Note #1: LILE = large-ion lithophile elements; ITE = incompatible trace elements
Note #2: The initial isotope ratios are recalculated by assuming an age of 35 Ma.
