# Supplementary material for: What do arc magmatism trace-element patterns and Sr–Nd–Pb isotopic data reflect? Insights from the Urumieh–Dokhtar magmatic arc of Iran
Source: Copernicus journal article supplement (doi:10.5194/se-16-663-2025), 2025-07-14
Supplement: Supplementary file 6 [file Supplementary Table S4.xlsx]

## Sheet: Table S4
Elements	UNITS	STANDARDS
		Genalysis Lab				University of Melbourne
		WMG-1	OREAS 45P	TKC5	SY-4	w2a-8	W2A-7	W2-D	BHVO-2-L	JA2-6	JR-1
Ba	ppm	105	277.8	532.2	346	169.622	170.056	169.386	132.043	312.825	46.8613
Rb	ppm	3.77	24.73	427.36	58.55	19.8551	19.8248	19.703	9.21553	69.8887	256.186
Sr	ppm	39.6	34.02	543.84	1255.05	194.761	195.383	194.366	393.675	242.473	26.531
Pb	ppm	11	22	1499	12	7.43686	7.42132	7.77406	1.49806	18.7397	18.6327
Th	ppm	1.08	9.78	141.3	1.54	2.10769	2.08545	2.11787	1.19007	4.65808	25.5136
Nb	ppm	6.08	23.89	46.27	14.16	7.33891	7.18057	7.27455	18.1072	8.95362	14.9085
Ta	ppm	0.43	0.6	67.99	1.01	0.457107	0.448181	0.455769	1.14398	0.645098	1.62484
Zr	ppm	40.2	154.7	215.5	85.7	88.3667	87.5985	87.3752	174.915	111.739	91.6642
Hf	ppm	1.33	4.56	7.05	1.68	2.37551	2.3214	2.36243	4.4519	2.86662	4.70029
La	ppm	7.74	24.52	259.89	61.21	10.5322	10.535	10.4896	15.2175	15.6285	19.6629
Ce	ppm	15.84	48.17	478.42	129.08	23.2173	23.2611	23.1696	37.682	32.7711	47.0047
Nd	ppm	8.88	21.26	185.19	59.88	12.9105	12.8929	12.9303	24.6486	14.2208	23.583
Sm	ppm	2.23	4.52	29.28	13.05	3.27646	3.26236	3.25436	6.03559	3.03221	5.62951
Eu	ppm	0.81	1.21	4.05	2.05	1.09303	1.08826	1.10022	2.06445	0.883297	0.278626
Tb	ppm	0.384	0.602	1.808	2.814	0.618804	0.609684	0.615064	0.950545	0.474812	0.98286
Y	ppm	13.74	15.92	27.28	127.07	20.0604	20.091	20.217	24.4449	15.7591	39.4819
Ho	ppm	0.49	0.67	1.09	4.75	0.80427	0.795863	0.809349	1.01268	0.611451	1.35149
Yb	ppm	1.27	1.89	1.79	16.07	2.06644	2.0403	2.06381	2.0204	1.69052	4.76566
Lu	ppm	0.197	0.293	0.292	2.274	0.301343	0.299586	0.30298	0.27661	0.250371	0.70823
U	ppm	0.61	2.46	17.49	0.81	0.503498	0.504494	0.507814	0.427898	2.2208	8.77784
