# Supplementary material for: What do arc magmatism trace-element patterns and Sr–Nd–Pb isotopic data reflect? Insights from the Urumieh–Dokhtar magmatic arc of Iran
Source: Copernicus journal article supplement (doi:10.5194/se-16-663-2025), 2025-07-14

**a**

LILE-poor series

- Primitive samples
- Differentiated samples

Marbin

- Primitive samples
- Differentiated samples

Kahang

- Mishab
- Differentiated samples

Fordou

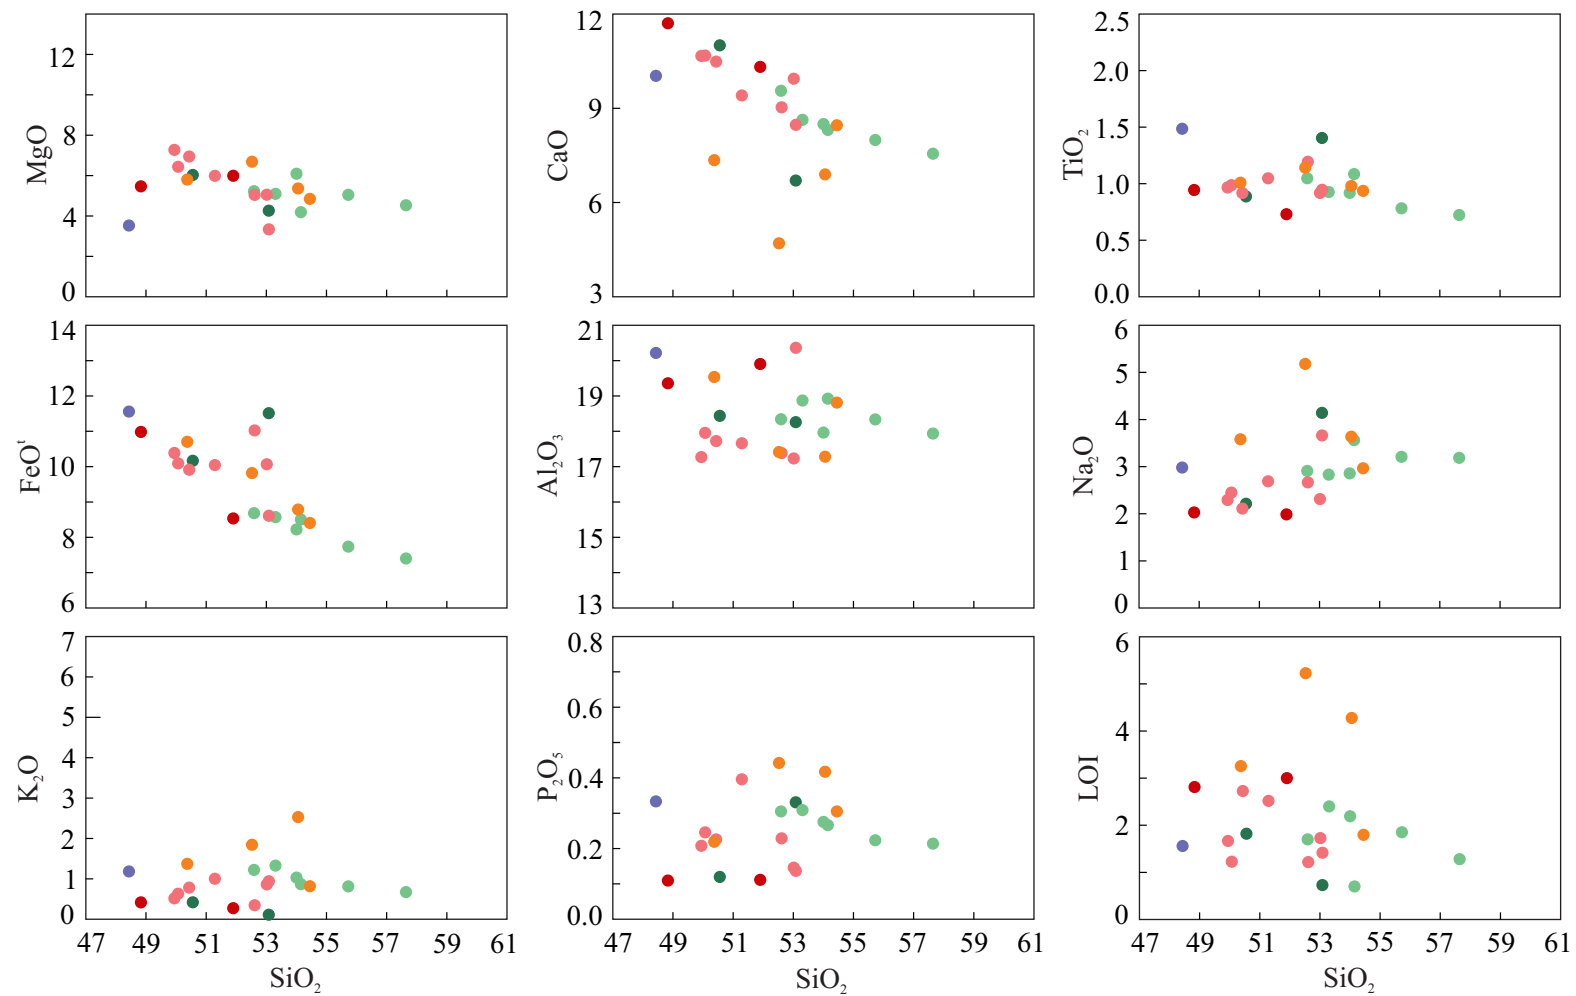

**b**

LILE-rich series

|                               |             |
|-------------------------------|-------------|
| ● Primitive samples           | ] Fordou    |
| ● Differentiated samples      |             |
| ● Primitive samples           | ] Vadghan   |
| ● Differentiated samples      |             |
| ● More differentiated samples | ] Nodoushan |
| ● Less differentiated samples |             |
| ● Mishab                      |             |

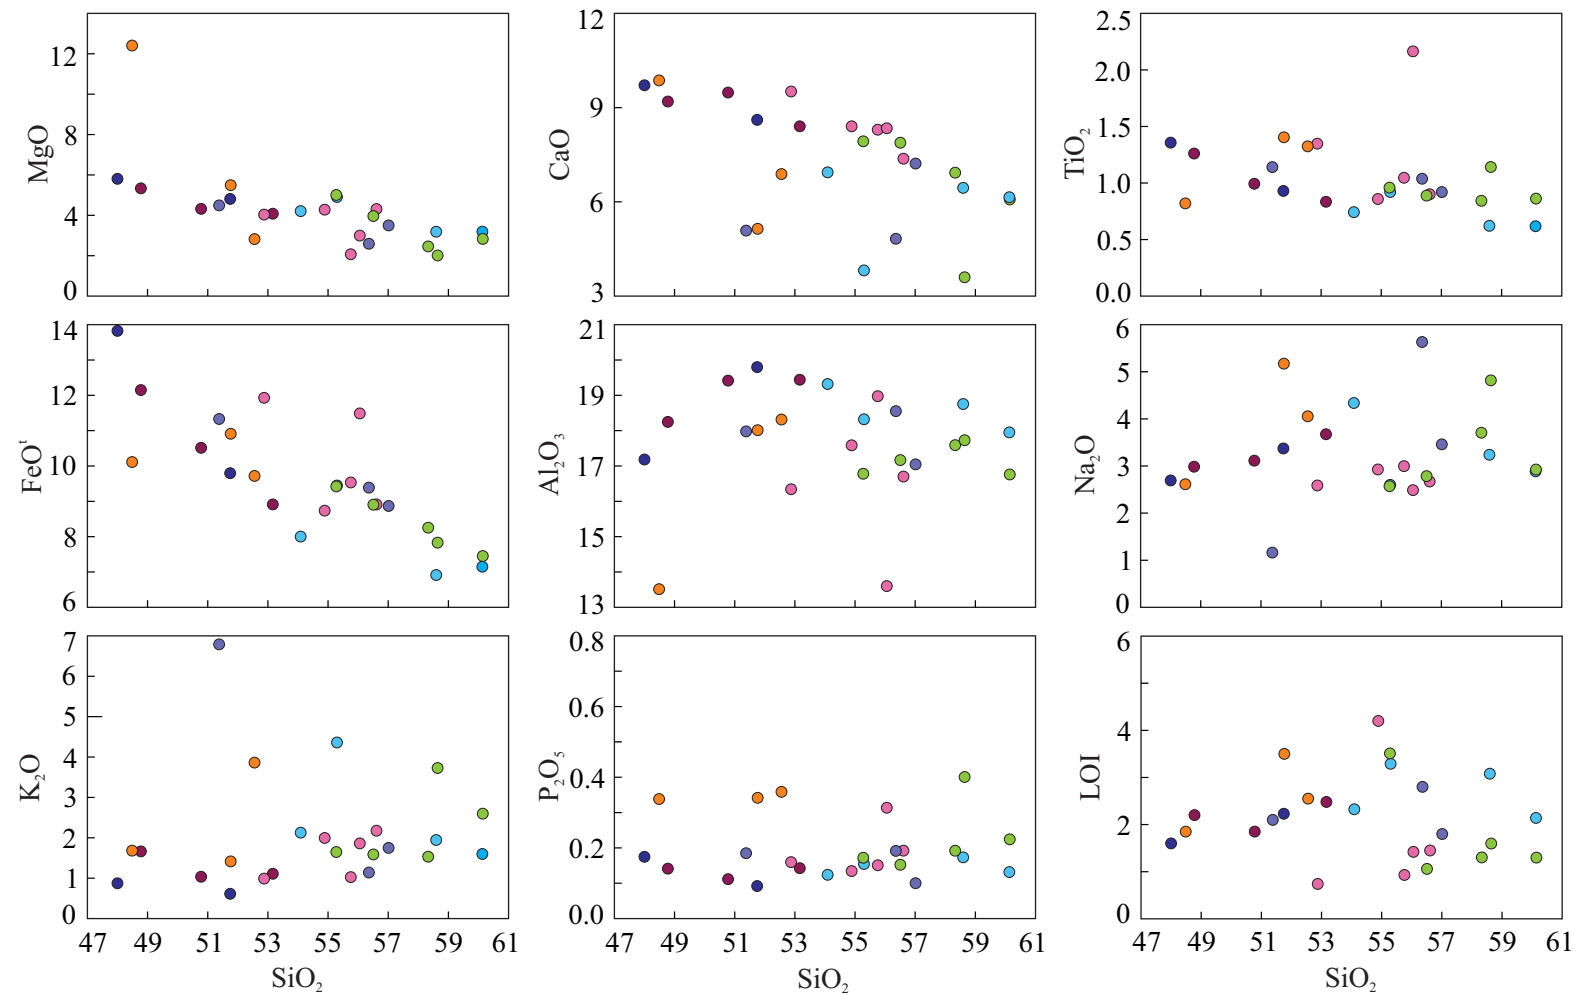

**c**

ITE-rich series

◆ Fordou

◆ Vadghan

◆ Mishab

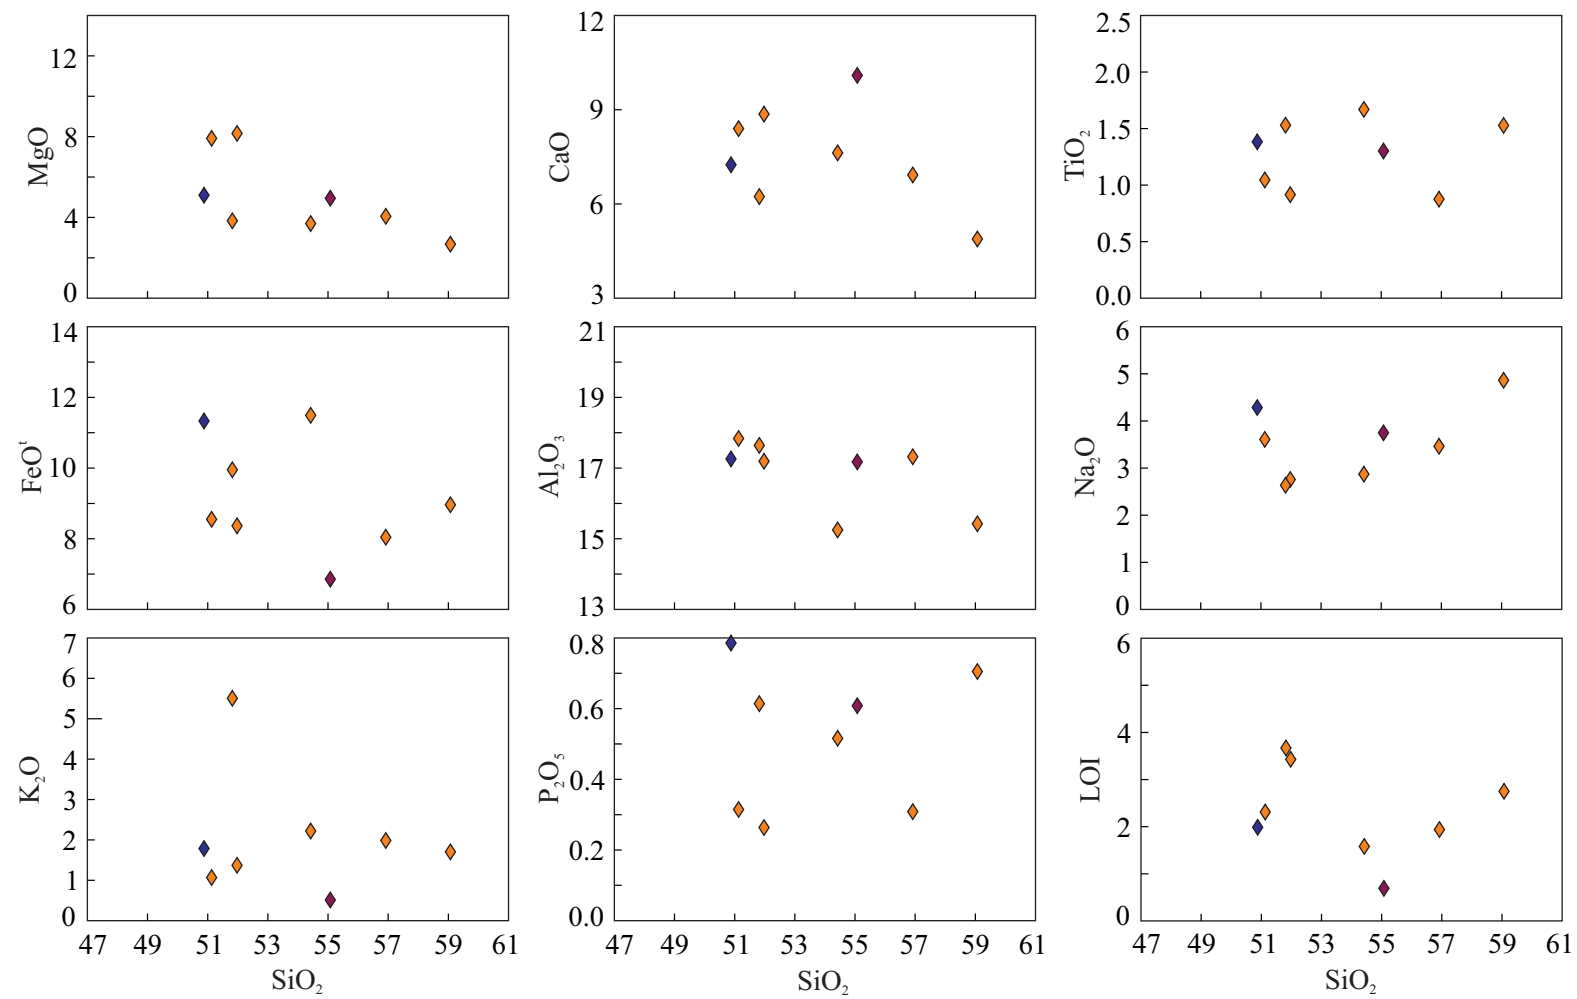

Supplement: Supplementary file 7 [file se-16-663-2025-supplement.zip]
