# Supplementary material for: What do arc magmatism trace-element patterns and Sr–Nd–Pb isotopic data reflect? Insights from the Urumieh–Dokhtar magmatic arc of Iran
Source: Copernicus journal article supplement (doi:10.5194/se-16-663-2025), 2025-07-14
Supplement: Supplementary file 7 [file Supplementary Table S5.xlsx]

## Sheet: Table S5
End-members	Sr	Nd	87Sr/86Sr(i)	143Nd/144Nd(i)
Mantle Wedge (MW) a	212	12.37	0.70263	0.51313
Altered Oceanic Crust (AOC) b	134	11.2	0.706	0.5131
Mobility c	0.41	0.22
Residual AOC	79	8.7
KD (AOC melting) d	0.054	0.164
AOC-melts (F = 0.25) b	272	23.4	0.706	0.5131
Tethyan Flysch e	349	25.9	0.7112	0.512107
Mobility c	0.46	0.21
Residual sediments	163	22.1
KD (sediment melting) f	0.001	0.05
Sediment-melts (F = 0.45) e	362	46	0.7112	0.512107
Note: the superscripts right to the numbers are the references.
References:
a - Kepezhinskas, P., McDermott, F., Defant, M.J., Hochstaedter, A., Drummond, M.S., Hawkesworth, C.J., Kokoskov, A., Maury, R., Bellon, H.: Trace element and Sr-Nd-Pb isotopic constraints on a three-component model of Kamchatka Arc petrogenesis, Geochim. Cosmochim. Acta, 61, 577-600, doi: 10.1016/S0016-7037(96)00349-3, 1997.
b- Hauff, F., Hoernle, K., Schmidt, A.: Sr-Nd-Pb composition of Mesozoic Pacific oceanic crust (Site 1149 and 801, ODP Leg 185): Implications for alteration of ocean crust and the input into the Izu-Bonin-Mariana subduction system, Geochem. Geophys. Geosyst., 4, doi: 10.1029/2002GC000421, 2003.
c - Stracke, A., Bizimis, M., Salters, V.J.M.: Recycling oceanic crust: Quantitative constraints, Geochem. Geophys. Geosyst., 4, 8003, doi: 10.1029/2001GC000223, 2003.
d- Pertermann, M., Hirschmann, M.M., Hametner, K., Gülnther, D., Schmidt, M.W.: Experimental determination of trace element partitioning between garnet and silica-rich liquid during anhydrous partial melting of MORB-like eclogite, Geochem. Geophys. Geosyst., 5, Q05A01, doi: 10.1029/2003GC000638, 2004.
e - Prelević, D., Foley, S.F., Romer, R., Sonticelli, S.: Mediterranean Tertiary lamproites derived from multiple source components in postcollisional geodynamics, Geochim. Cosmochim. Acta, 72, 2125-2156, doi: 10.1016/j.gca.2008.01.029, 2008.
f - Guo, F., Li, H.X., Fan, W.M., Li, J.Y., Zhao, L., Huang, M.W.: Variable sediment flux in generation of Permian subduction-related mafic intrusions from the Yanbian region, NE China. Lithos 261, 195–215, doi: 10.1016/j.lithos.2015.11.030, 2016.
																				0
