# Supplementary figures and images for: What do arc magmatism trace-element patterns and Sr–Nd–Pb isotopic data reflect? Insights from the Urumieh–Dokhtar magmatic arc of Iran
Source: Copernicus journal article supplement (doi:10.5194/se-16-663-2025), 2025-07-14

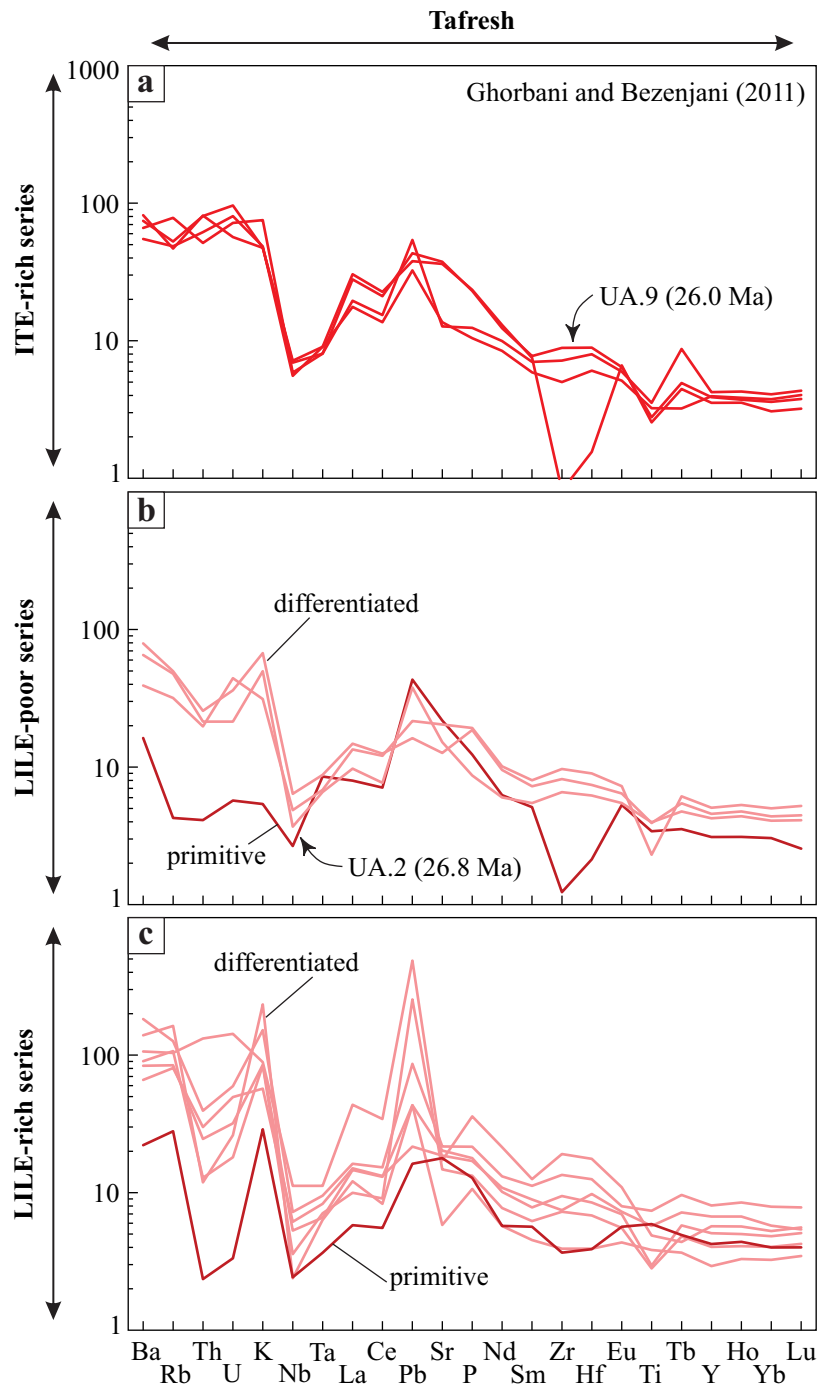

Supplement: Supplementary file 2 [file se-16-663-2025-supplement.zip]

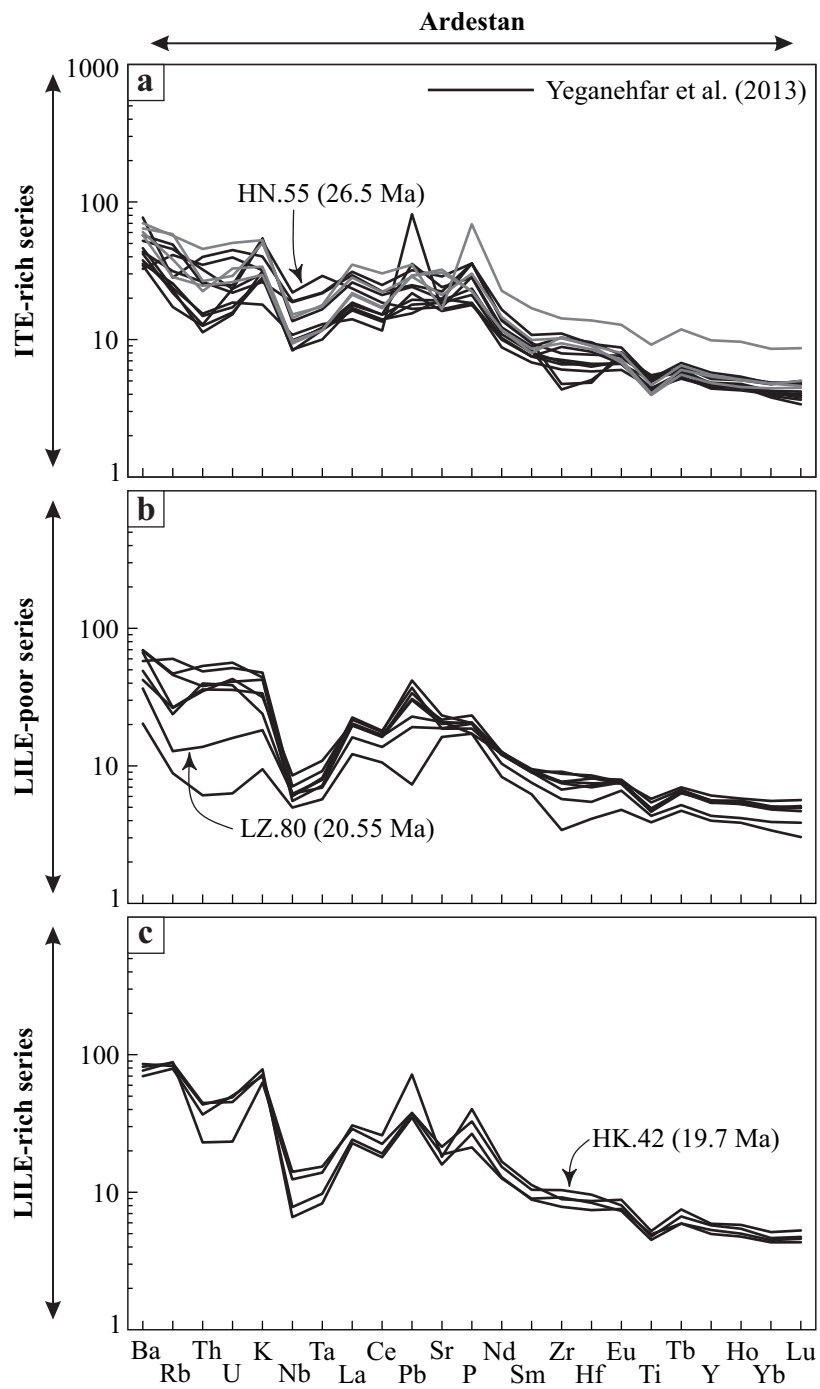

Supplement: Supplementary file 4 [file se-16-663-2025-supplement.zip]

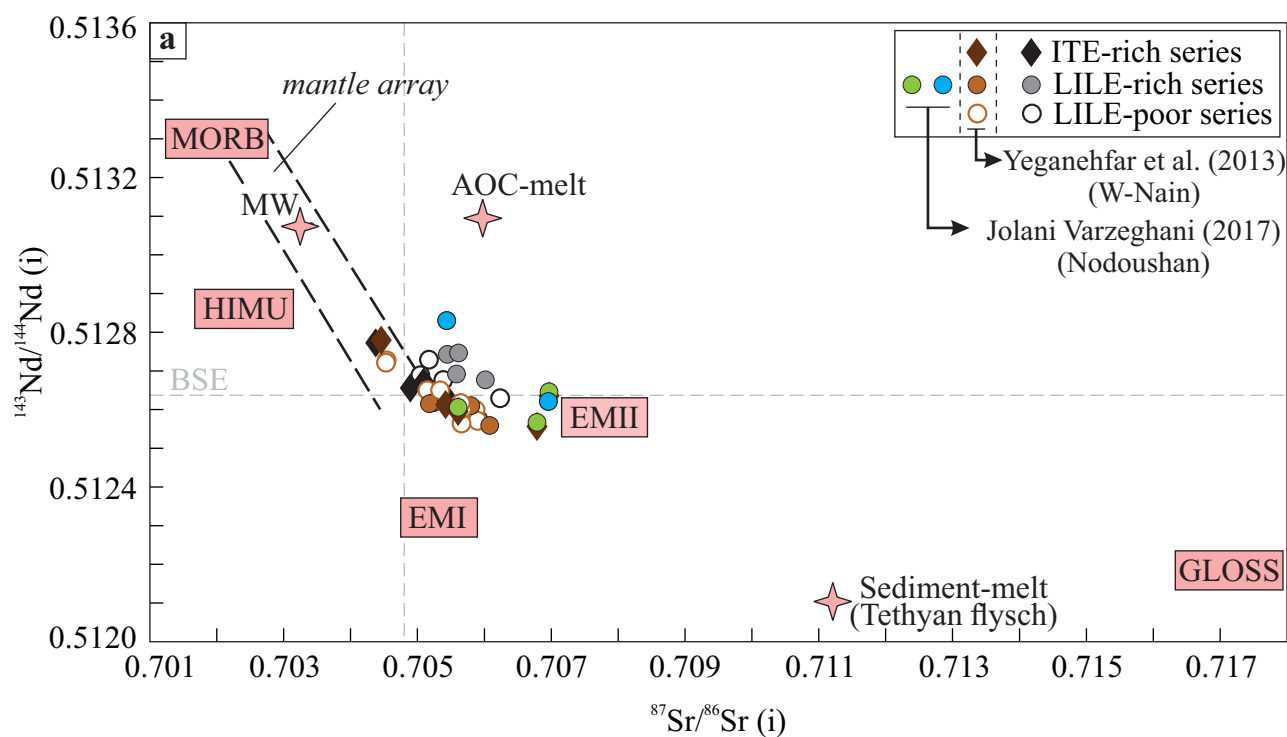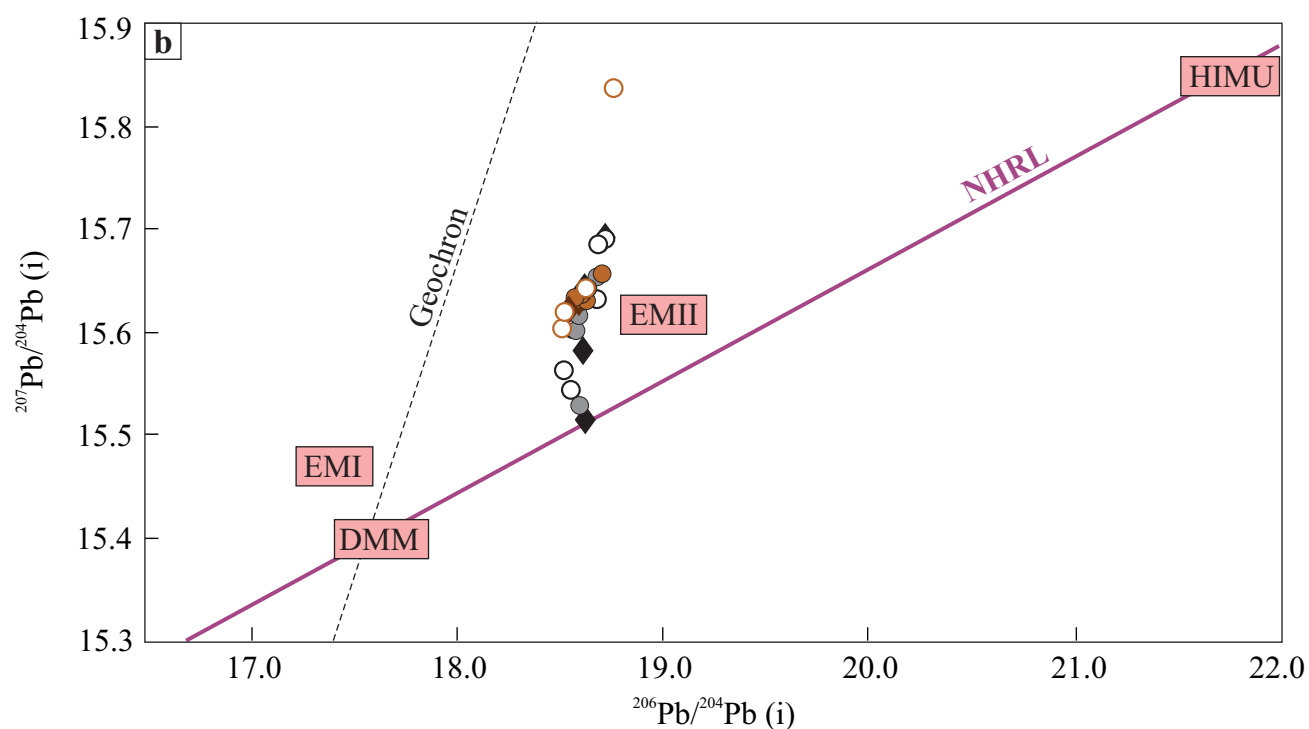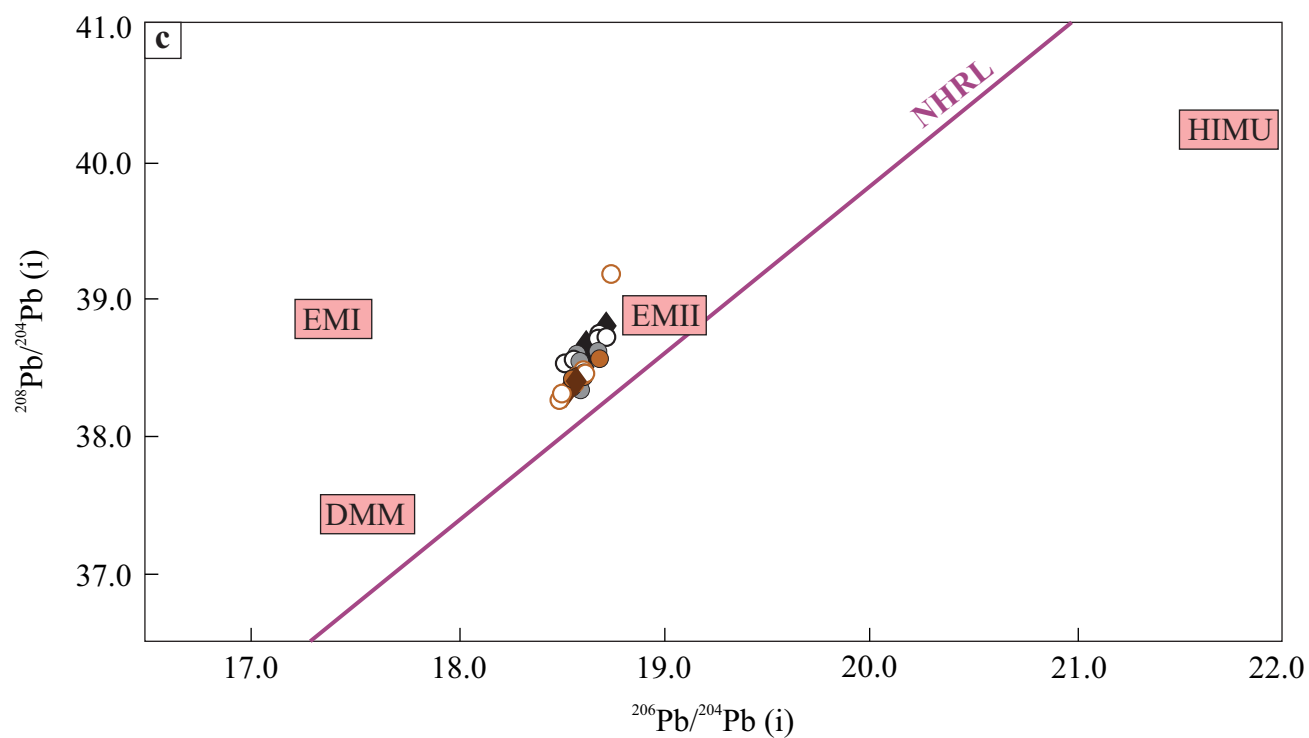

Supplement: Supplementary file 5 [file se-16-663-2025-supplement.zip]

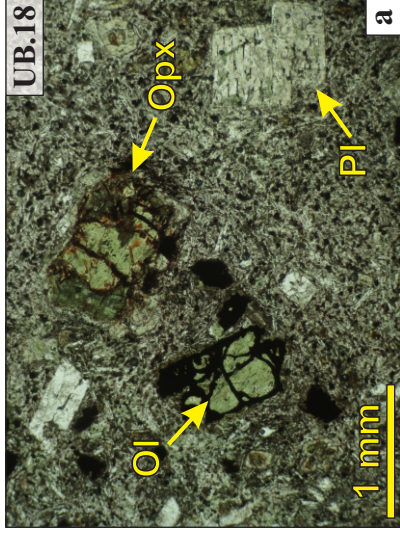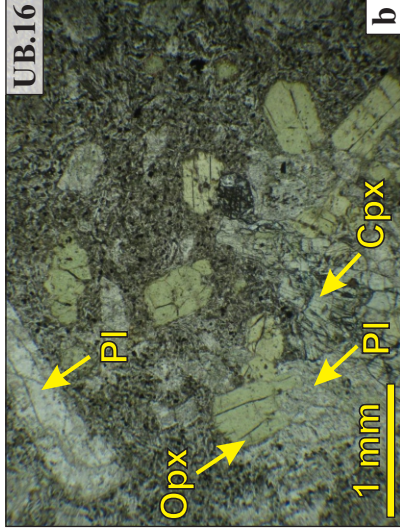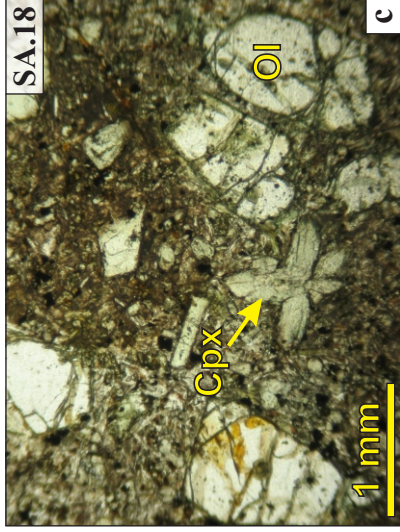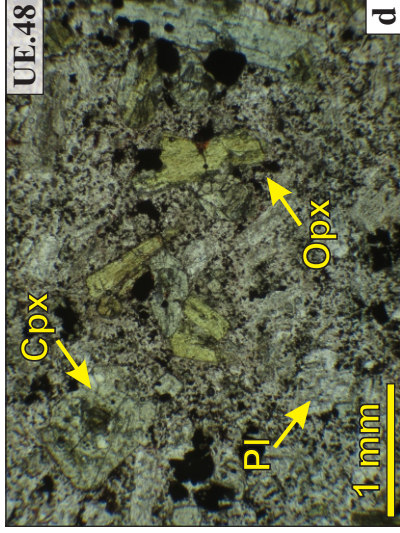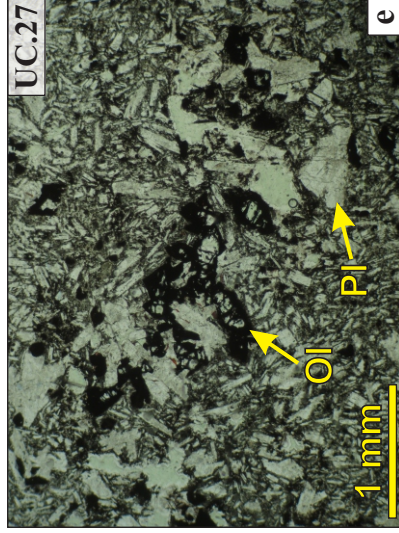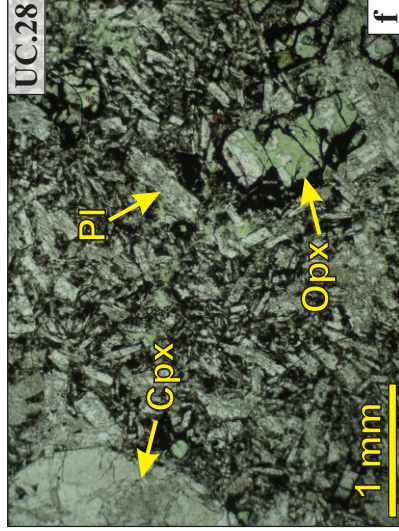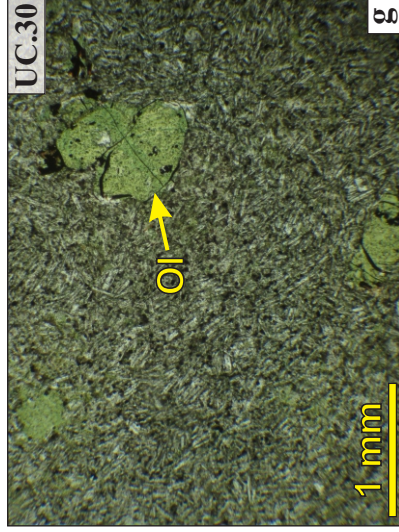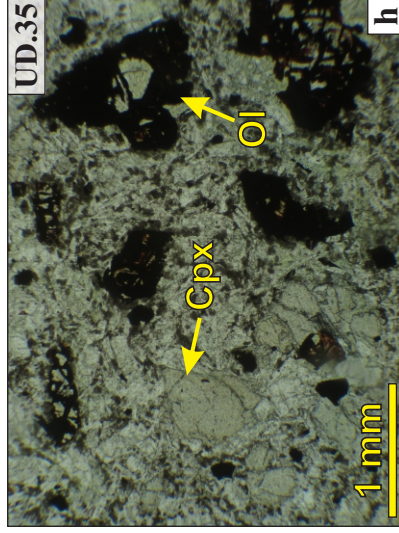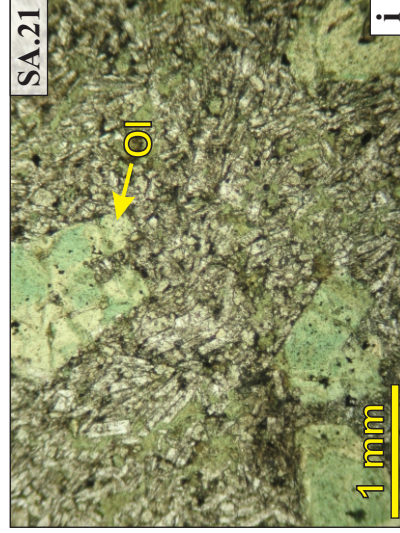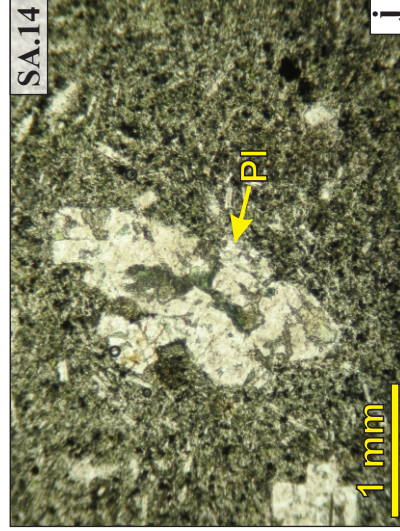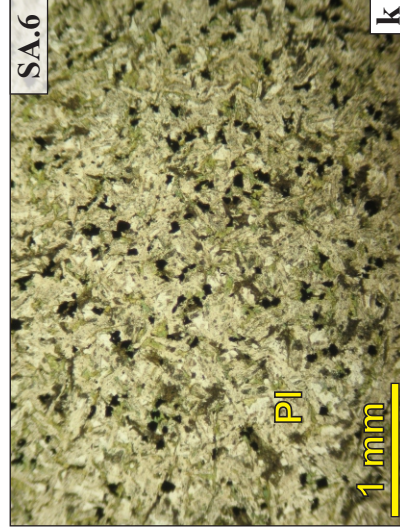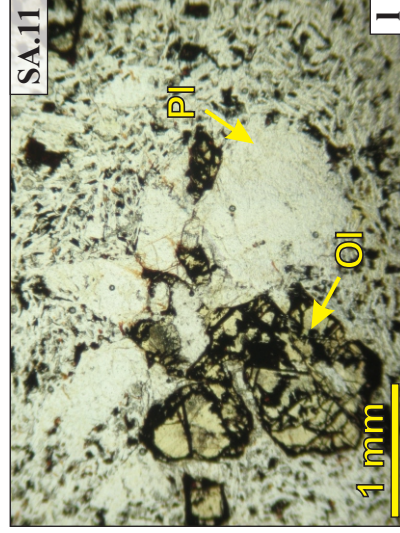

Supplement: Supplementary file 6 [file se-16-663-2025-supplement.zip]
